# Supplementary material
Source: PubMed Central journal article supplement (PMC3989676)
Supplement: embr0015-0446-sd3.pdf [file embr0015-0446-sd3.pdf]

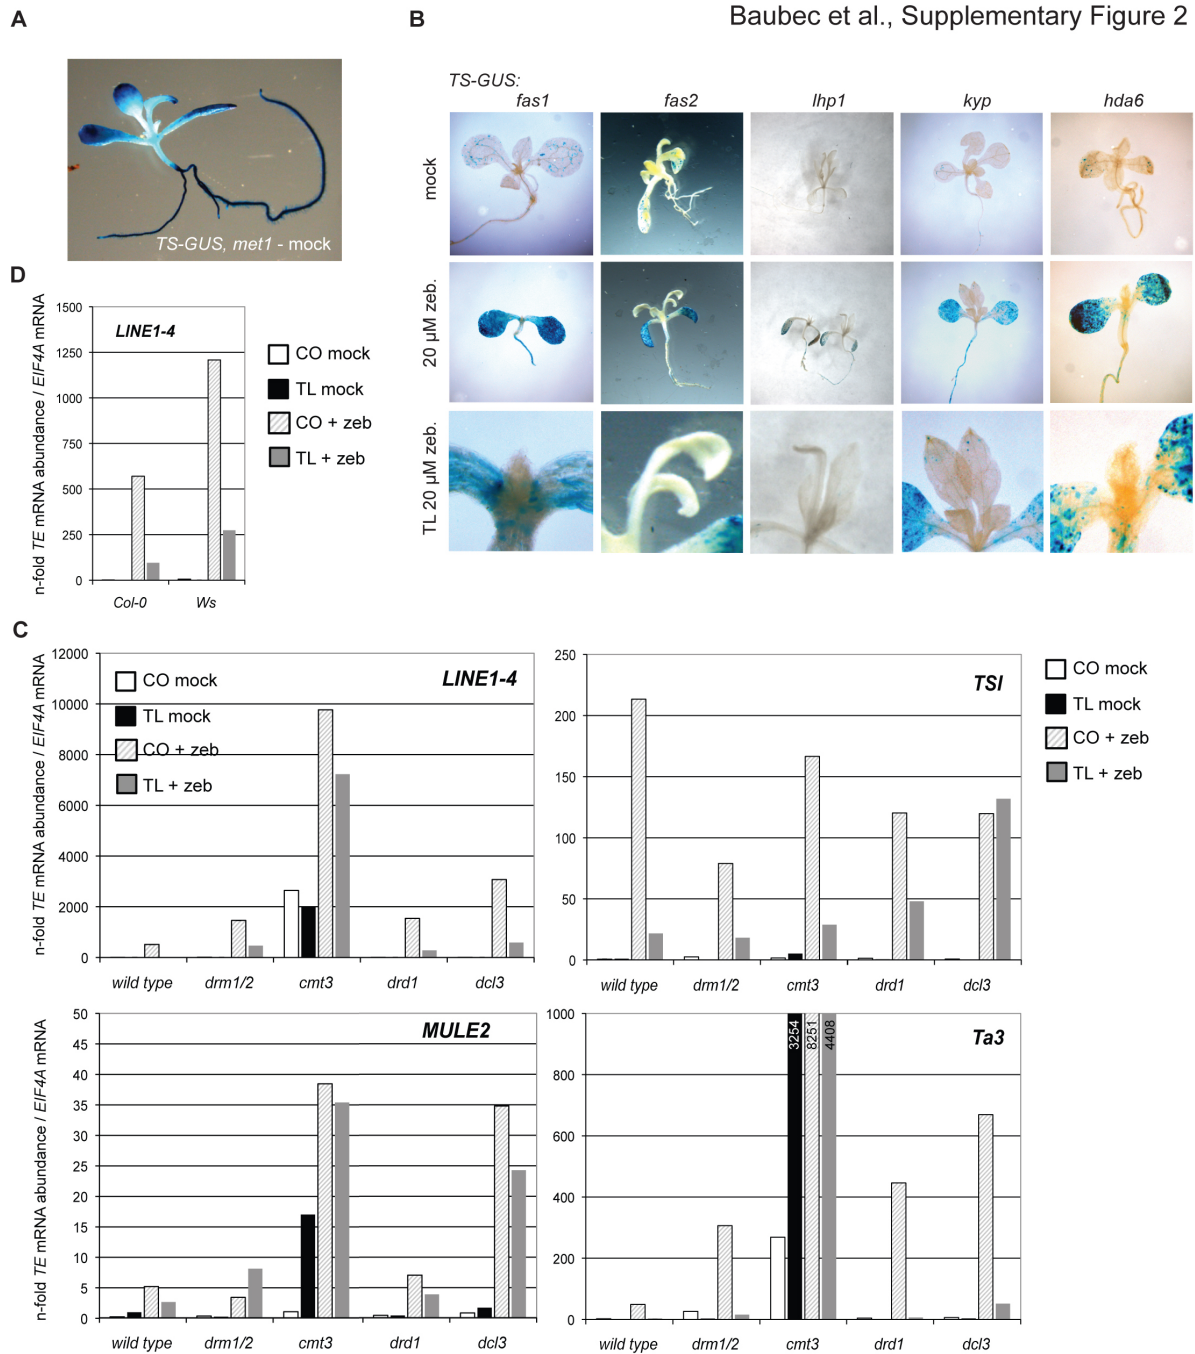

**Supplementary Figure S2. Zebularine reactivates transposable elements (TEs) in true leaves of RdDM mutant plants. (A)** Complete *TS-GUS* reactivation in mock-treated *met1* seedling. **(B)** GUS staining in mock- and zebularine-treated *TS-GUS* seedlings in *fas1*, *fas2*, *kyp*, *lhp1* and *hda6* mutant backgrounds (related to main figure 2A). **(C)** Results from quantitative reverse-transcription PCR showing n-fold *LINE1-4*, *TSI*, *MULE2* and *Ta3* mRNA abundance normalized to *EIF4A1* mRNA in cotyledons and true leaves dissected from wild type and mutant plants ± zebularine treatments (related to main figure 2B). **(D)** The same type of analysis as in (C) indicating natural variation in the silencing of *LINE1-4* between Col-0 and Ws-2 accessions. Barplots in C and D indicate results from one experiment each using pooled tissues from >20 plants per sample.
