# Supplementary material
Source: PubMed Central journal article supplement (PMC3989676)
Supplement: embr0015-0446-sd9.pdf [file embr0015-0446-sd9.pdf]

**Supplementary Table S4.** Real-time and bisulfite PCR primers used in this study.

| Gene           | AGI ID                      | Name           | 5' to 3'                       | Method  |
|----------------|-----------------------------|----------------|--------------------------------|---------|
| <i>ACTIN2</i>  | <i>At3g18780</i>            | ACT2qF         | TCCACGAGACAACCTATAACTCAATCA    | RT-qPCR |
|                |                             | ACT2qR         | TGCAAGTGCTGTGATTTCTTTGCTCAT    |         |
| <i>AGO4</i>    | <i>At2g27040</i>            | AGO4qF         | GAAGCACCAGTGCCATTTCTGTT        | RT-qPCR |
|                |                             | AGO4qR         | GAGATTGGTCCTGGAGCTGTGATA       |         |
| <i>CMT3</i>    | <i>At1g69770</i>            | CMT3qF         | GAAATTGTCCCCACTGTTGTCACA       | RT-qPCR |
|                |                             | CMT3qR         | CTGGAAAGCTGTTCCCAAAGCATAT      |         |
| <i>DDM1</i>    | <i>At5g66750</i>            | DDMex16F       | TCC CTG AAC AGT TAG GAC ACA TT | RT-qPCR |
|                |                             | DDM1RT         | AAA AAC TTC CGA GCC CTC TAA TA |         |
| <i>DRD1</i>    | <i>At2g16390</i>            | DRD1qF         | CCGTGTCTGCGGAGTTATTGAGA        | RT-qPCR |
|                |                             | DRD1qR         | TCCCTCAATTTGATGAGGCTTCATTTTC   |         |
| <i>EIA4A1</i>  | <i>At3g13920</i>            | EIF4A-F        | ATCCAAGTTGGTGTGTTCTCC          | RT-qPCR |
|                |                             | EIF4A-R        | GAGTGTCTCGAGCTTCCACTC          |         |
| <i>LINE1-4</i> | <i>At2g01840</i>            | LINE1-4-F      | CCCATGGTGACCAAGAGTTT           | RT-qPCR |
|                |                             | LINE1-4-R      | TCAATGTCCGGAGACCTCCTC          |         |
|                |                             | bs_AtLINE1-4_F | TTTATAAAAAAATAGAGGATAAYAAAAAG  |         |
| bs_AtLINE1-4_R | RAAACCAACCAAACCCCAARTTC     |                |                                |         |
| <i>MET1</i>    | <i>At5g49160</i>            | MET1qF         | CTGAACAGCACAGAATCCTTACAGT      | RT-qPCR |
|                |                             | MET1qR         | AATGCCAAATTTGGGTGGTTATCTAG     |         |
| <i>MULE2</i>   | <i>At2g15810</i>            | MULE2-F        | CTGTCCGCGAGTGTCATCAAGTAGC      | RT-qPCR |
|                |                             | MULE2-R        | GATACTTGTGACAAAGTGTTAGCAAGCC   |         |
|                |                             | bs_MULE2_F     | GATTAGTAGTGGTAAAYAAAYTATAA     |         |
| bs_MULE2_R     | CTAAAAAAACCCAACTATTTTTTATTT |                |                                |         |
| <i>RDR2</i>    | <i>At4g11130</i>            | RDR2qF         | TCTAATGGATCATGACGTCACGTTAG     | RT-qPCR |
|                |                             | RDR2qR         | GAAGATTTGCTAACTCTAGACACTTCT    |         |
| <i>Ta3</i>     | <i>At1g37110</i>            | Ta3-F          | GTAGCCCAGAGATCTGCAGTTGTAGCATA  | RT-qPCR |
|                |                             | Ta3-R          | TTCAGGTAATAAAGAAGTACCAGATCCTG  |         |
| <i>TS-GUS</i>  | transgene                   | qPCR-GUS-F     | TTAACTATGCCGGAATCCATCGC        | RT-qPCR |
|                |                             | qPCR-GUS-R     | CACCACCTGCCAGTCAACAGACGC       |         |
| <i>TSI</i>     | multicopy                   | TSI-F          | CTCTACCCTTTGCATTCATGAATCCTT    | RT-qPCR |
|                |                             | TSI-R          | GATGGGCCAAAAGCCCTCGGTTTTAAATG  |         |
